# Supplementary material for: The Relationship between Changes in Hydro-Climate Factors and Maize Crop Production in the Equatorial African Region from 1980 to 2021
Source: MDPI journal article supplement (doi:10.3390/atmos15050542), 2024-04-28
Supplement: s1 [file s1]

## Supplementary Materials:

Isaac Kwesi Nooni <sup>1</sup>, Faustin Katchele Ogou <sup>2</sup>, Daniel Fiifi Tawiah Hagan <sup>3</sup>, Abdoul Aziz Saidou Chaibou <sup>4</sup>, Nana Agyemang Prempeh <sup>5</sup>, Francis Mawuli Nakoty <sup>6</sup>, Zhongfang Jin <sup>7</sup> and Jiao Lu <sup>1,\*</sup>

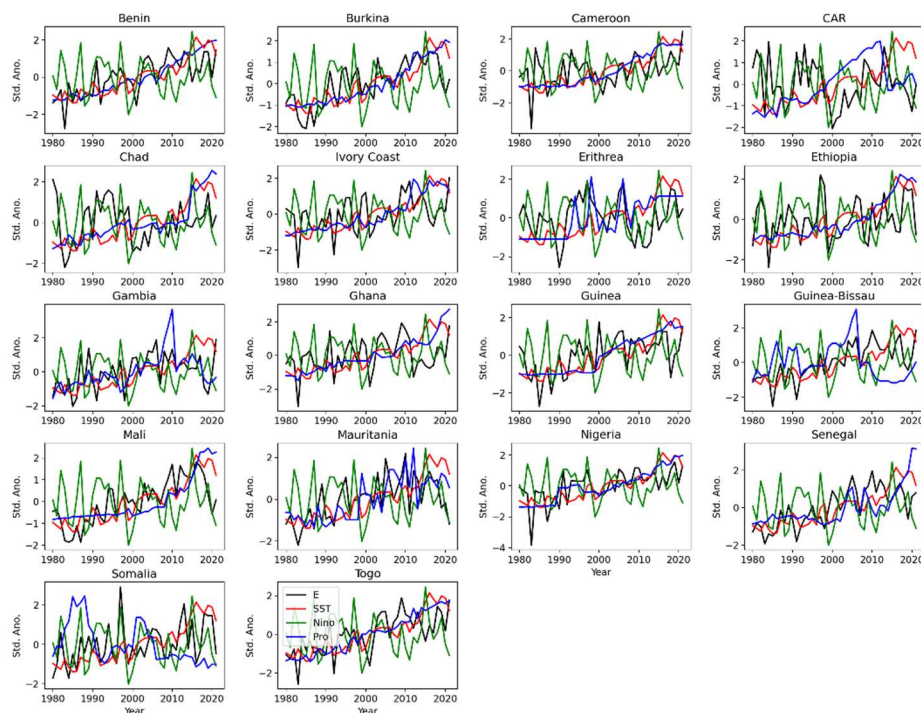

**Figure S1.** Trends in maize production anomalies in response to E and teleconnection (SST and El Niño 3.4 index).

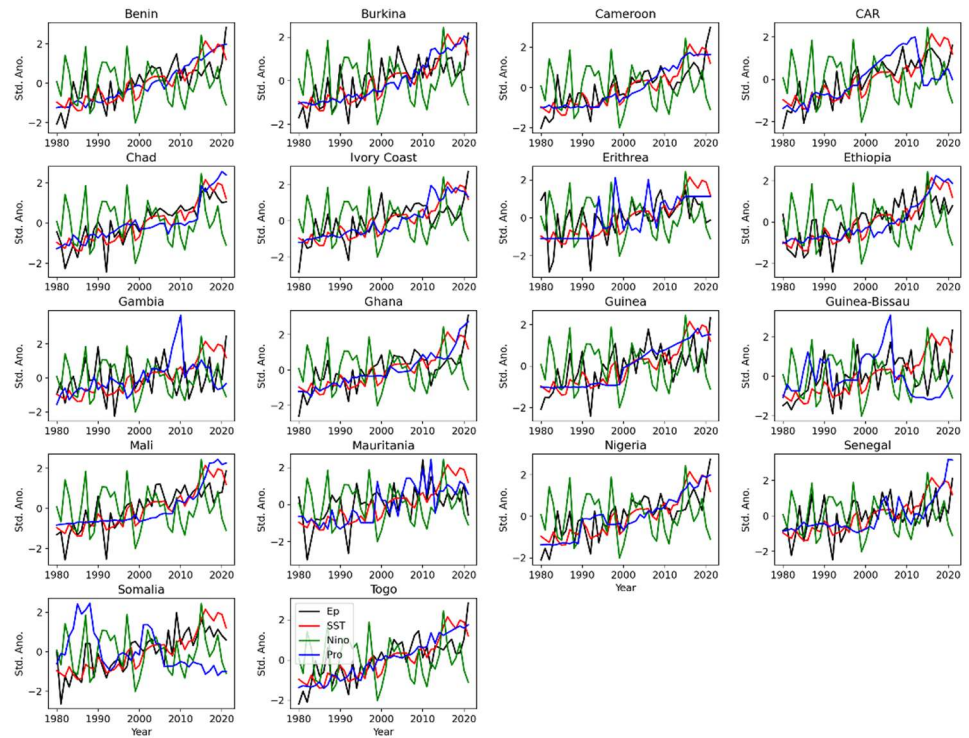

**Figure S2.** Trends in maize production anomalies in response to Ep and teleconnection (SST and El Niño 3.4 index).

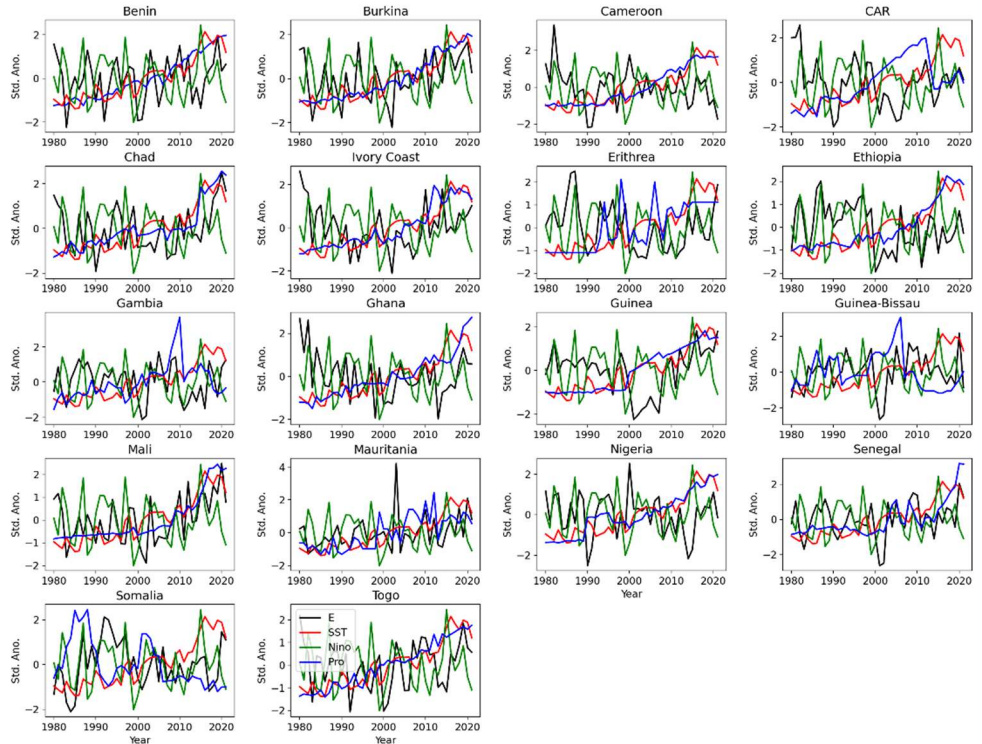

**Figure S3.** Trends in maize production anomalies in response to PRE and teleconnection (SST and El Niño 3.4 index).

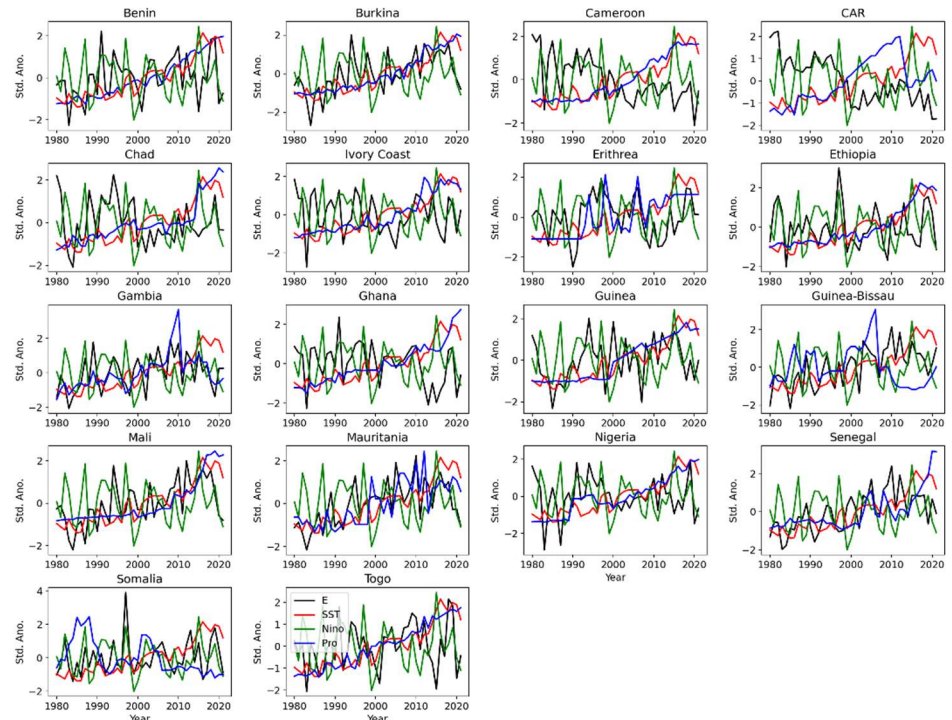

**Figure S4.** Trends in maize production anomalies in response to SMsurf and teleconnection (SST and El Niño 3.4 index).

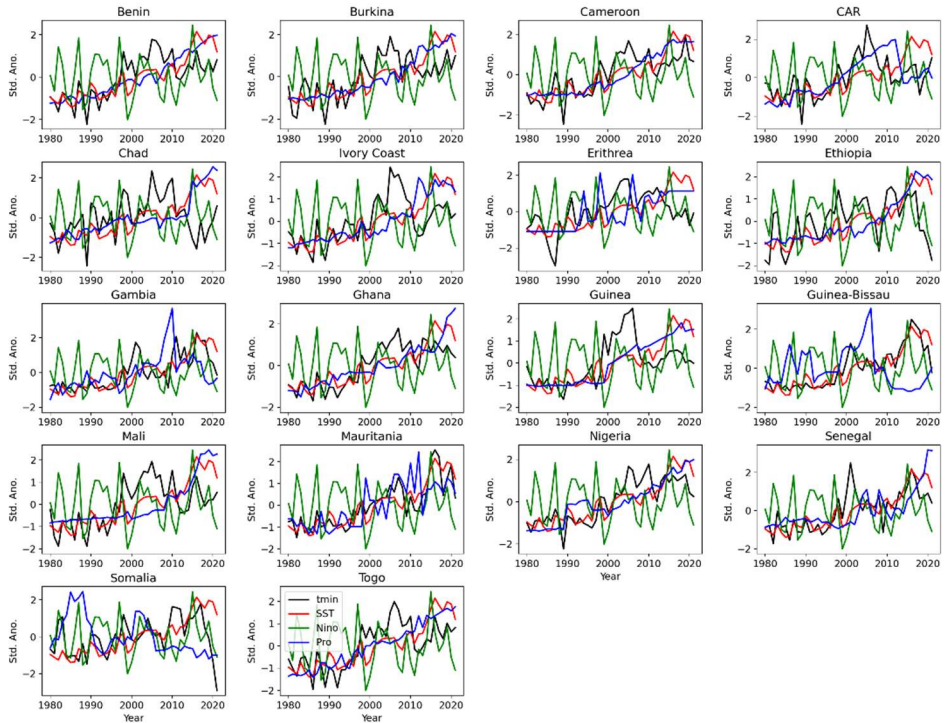

**Figure S5.** Trends in maize production anomalies in response to SM and teleconnection (SST and El Niño 3.4 index).
